# Supplementary material for: Cholinergic and perfusion brain networks in Parkinson disease dementia
Source: PubMed Central journal article supplement — Neurology. 2016 Jul 12;87(2):178–85. doi: 10.1212/WNL.0000000000002839 (PMC4940066; doi:10.1212/wnl.0000000000002839), 2016-07-12
Supplement: supp_WNL.0000000000002839_e-tables.pdf [file supp_WNL.0000000000002839_e-tables.pdf]

**table e-1.** Location of regions contributing to the M1/M4 disease related pattern in PDD.

| Hemisphere | MNI coordinates | Region                  | Z score |
|------------|-----------------|-------------------------|---------|
| R          | 32, 8, -28      | Temporal pole           | -2.8    |
| L          | -24, 12, -36    | Temporal pole           | -3.0    |
| R          | 40, -24, -28    | Fusiform gyrus          | -2.7    |
| L          | -32, -32, -28   | Fusiform gyrus          | -2.7    |
| R          | 12, 16, -8      | Basal forebrain         | -2.8    |
| L          | -8, 16, -4      | Basal forebrain         | -3.2    |
| R          | 16, 24, -4      | Caudate                 | -2.5    |
| L          | -8, 12, 0       | Caudate                 | -3.4    |
| R          | 24, 12, -4      | Putamen                 | -2.9    |
| L          | -20, 8, -8      | Putamen                 | -1.8    |
| R          | 20, 0, 0        | Pallidum                | -1.8    |
| L          | -20, -4, 0      | Pallidum                | -2.3    |
| R          | 40, 12, -8      | Insula                  | -2.3    |
| L          | -40, 12, -8     | Insula                  | -1.7    |
| R          | 4, 12, 36       | Anterior cingulate      | -1.7    |
| L          | 0, 12, 36       | Anterior cingulate      | -1.8    |
| L          | -20, -4, -16    | Amygdala                | -2.6    |
| L          | -20, -12, -20   | Hippocampus             | -2.1    |
| L          | -28, -28, -24   | Parahippocampal gyrus   | -2.3    |
| R          | 24, 48, -12     | Frontal pole            | 3.3     |
| L          | -28, 44, -12    | Frontal pole            | 2.3     |
| R          | 16, -92, 0      | Occipital pole          | 3.2     |
| L          | -12, -96, 4     | Occipital pole          | 2.6     |
| R          | 40, -64, 48     | Precuneus               | 2.5     |
| L          | -24, -72, 48    | Precuneus               | 2.7     |
| R          | 52, -56, -12    | Inferior temporal gyrus | 2.6     |
| R          | 56, -56, 4      | Middle temporal gyrus   | 3.4     |

**table e-2.** Location of regions contributing to the rCBF disease related pattern in PDD.

| Hemisphere | MNI coordinates | Region                  | Z score |
|------------|-----------------|-------------------------|---------|
| R          | 4, 32, 48       | Superior frontal gyrus  | -1.8    |
| L          | -20, 32, 48     | Superior frontal gyrus  | -2.3    |
| R          | 40, 28, 36      | Middle frontal gyrus    | -2.0    |
| L          | -36, 24, 44     | Middle frontal gyrus    | -2.3    |
| R          | 60, -48, -16    | Inferior temporal gyrus | -3.0    |
| R          | 60, -44, -8     | Middle temporal gyrus   | -2.7    |
| L          | -60, -32, -8    | Middle temporal gyrus   | -2.2    |
| R          | 64, -32, 4      | Superior temporal gyrus | -2.8    |
| L          | -60, -28, 0     | Superior temporal gyrus | -2.1    |
| R          | 4, 48, 20       | Paracingulate gyrus     | -2.3    |
| L          | -4, 48, 20      | Paracingulate gyrus     | -2.1    |
| R          | 4, -60, 40      | Precuneus               | -3.7    |
| L          | -4, -64, 40     | Precuneus               | -4.1    |
| R          | 4, -52, 32      | posterior cingulate     | -2.3    |
| L          | -4, -56, 28     | posterior cingulate     | -3.0    |
| R          | 44, -64, 48     | Inferior parietal       | -3.8    |
| L          | -40, -60, 44    | Inferior parietal       | -4.0    |
| R          | 40, -64, 52     | Superior parietal       | -2.5    |
| L          | -28, -68, 52    | Superior parietal       | -3.2    |
| L          | -12, 12, 8      | Caudate                 | -1.9    |
| R          | 20, -56, -40    | Posterior cerebellum    | 2.7     |
| L          | -12, -52, -40   | Posterior cerebellum    | 2.4     |
|            | 4, -28, -12     | Midbrain                | 2.7     |
|            | 8, -36, -24     | Pons                    | 2.0     |
| R          | 20, -20, 8      | Thalamus                | 2.1     |
| L          | -12, -20, 8     | Thalamus                | 2.4     |
| R          | 32, -12, 0      | Putamen                 | 1.9     |
| L          | -28, -8, 0      | Putamen                 | 2.5     |
| R          | 24, -8, 0       | Pallidum                | 1.8     |
| L          | -20, -8, 0      | Pallidum                | 2.5     |
| R          | 52, 0, 48       | Precentral gyrus        | 1.7     |
| L          | -56, 0, 36      | Precentral gyrus        | 2.3     |
| R          | 64, -12, 32     | Postcentral gyrus       | 2.1     |
| L          | -60, -12, 32    | Postcentral gyrus       | 2.2     |
| L          | -28, -12, -24   | Hippocampus             | 1.8     |
| L          | -28, -4, -20    | Amygdala                | 2.0     |

**table e-3.** Location of regions contributing to the M1/M4 ‘responder’ pattern in PDD.

| Hemisphere | MNI coordinates | Region                  | Z score |
|------------|-----------------|-------------------------|---------|
| R          | 48, 12, -24     | Temporal pole           | -3.6    |
| L          | -24, 8, -32     | Temporal pole           | -1.7    |
| R          | 32, -32, -24    | Fusiform gyrus          | -2.5    |
| L          | -28, -32, -24   | Fusiform gyrus          | -2.0    |
| R          | 52, -44, -24    | Inferior temporal gyrus | -3.9    |
| L          | -52, -52, -24   | Inferior temporal gyrus | -2.5    |
| L          | -60, -52, -4    | Middle temporal gyrus   | -3.4    |
| R          | 8, -72, -8      | Lingual gyrus           | -4.3    |
| L          | -8, -72, -8     | Lingual gyrus           | -1.8    |
| R          | 24, 12, -8      | Putamen                 | -2.0    |
| L          | -24, 12, -8     | Putamen                 | -2.3    |
| L          | -20, -12, 0     | Pallidum                | -2.5    |
| R          | 8, -16, 72      | Precentral gyrus        | -3.4    |
| L          | -4, -16, 72     | Precentral gyrus        | -3.1    |
| R          | 4, 20, 32       | Anterior cingulate      | -2.6    |
| L          | 0, 24, 28       | Anterior cingulate      | -2.4    |
| L          | -24, -12, -12   | Amygdala                | -3.0    |
| L          | -16, 12, 64     | Superior frontal gyrus  | -3.8    |
| R          | 52, 16, 8       | Inferior frontal gyrus  | -3.0    |
| R          | 8, 40, -24      | Medial frontal gyrus    | 4.4     |
| L          | -4, 40, -24     | Medial frontal gyrus    | 3.6     |
| R          | 20, 28, -20     | Orbitofrontal cortex    | 3.6     |
| L          | -24, 20, -20    | Orbitofrontal cortex    | 2.9     |
| R          | 44, 32, 32      | Middle frontal gyrus    | 2.5     |
| R          | 52, 32, 4       | Inferior frontal gyrus  | 2.3     |
| R          | 24, 60, 0       | Frontal pole            | 3.7     |
| L          | -16, 44, 40     | Frontal pole            | 2.1     |
| R          | 56, -28, 24     | Inferior parietal       | 3.8     |
| L          | -52, -32, 24    | Inferior parietal       | 5.3     |
| R          | 16, -68, 28     | Ventral precuneus       | 3.2     |
| L          | 0, -68, 28      | Ventral precuneus       | 3.9     |
| R          | 20, -64, 16     | Posterior cingulate     | 4.1     |
| L          | -4, -52, 16     | Posterior cingulate     | 2.9     |
| R          | 48, -56, -12    | Inferior temporal gyrus | 3.9     |
